# Supplementary material for: Wing morphology, flight type and migration distance predict accumulated fuel load in birds
Source: Oxford University Press journal article supplement (doi:10.1242/jeb.183517), 2018-01-01

## **Supporting Information**

**Table S1.** – Species-specific data on 213 bird species regarding wing morphology (wing span, wing area, wing aspect ratio), flight type (1 – continuous flapping; 2a – flapping and soaring; 2b – flapping and gliding; 3 – passerine type, following categorization by Bruderer et al. 2010), migration distance, body mass (maximum, mean and sample size for males and females separately, as well as data source), and result of log-log linear regressions between body mass and wing length in 45 species of birds captured in the Danube-Delta Biosphere reserve (sample size (n), slope and associated standard error, p value and the 95<sup>th</sup> quantile of the residuals).

[Click here to Download Table S1](#)

## REFERENCES

1. **Bruderer, B., Peter, D., Boldt, A. and Liechti, F.** (2010). Wing-beat characteristics of birds recorded with tracking radar and cine camera. *Ibis* **152**, 272–291.
2. **Dunning Jr, J. B.** (Ed.). (1992). *CRC handbook of avian body masses*. CRC press, Boca Raton.
3. **Cramp, S.** (1998). *The Complete Birds of the Western Palearctic on CD-ROM*. Oxford University Press, Oxford.
4. **Beer, J. V.** (1963). The rapid sexing of downy Anatidae by the structure of the syrinx. *Wildfowl* **14**, 114–119.
5. **Mitchell, C., Cranswick, P., Kharitonov, S., Mitev, D., Quinn, J. L., Rozenfeld, S., Swann, B. and Vangeluwe, D.** (2015). Biometrics of wild Red-breasted Geese *Branta ruficollis*. *Wildfowl* **65**, 154–166.
6. **Holmgren, N., Ellegren, H. and Pettersson, J.** (1993). Stopover length; body mass and fuel deposition rate in autumn migrating adult Dunlins *Calidris alpina*: evaluating the effects of moulting status and age. *Ardea* **81**, 9–20.
7. **Battley, P. F., Piersma, T., Rogers, D. I., Dekinga, A., Spaans, B. and Van Gils, J. A.** (2004). Do body condition and plumage during fuelling predict northwards departure dates of Great Knots *Calidris tenuirostris* from north-west Australia? *Ibis* **146**, 46–60.
8. **Hildén, O.** (1974). Finnish bird stations, their activities and aims. *Ornis Fenn.* **51**, 10–35.
9. **Włodarczyk, R., Minias, P., Kaczmarek, K., Janiszewski, T. and Kleszcz, A.** (2007). Different migration strategies used by two inland wader species during autumn migration; case of Wood Sandpiper *Tringa glareola* and Common Snipe *Gallinago gallinago*. *Ornis Fenn.* **84**, 119.
10. **Ottosson, U., Waldenström, J., Hjort, C. and McGregor, R.** (2005). Garden Warbler *Sylvia borin* migration in sub-Saharan West Africa: phenology and body mass changes. *Ibis* **147**, 750–757.

**Table S2.** – Results of the model comparisons based on Akaike's Information Criteria for small sample sizes (AICc). For each possible model formula we present AICc, degree of freedom (df), number of parameters estimated (k), difference of AICc value from the smallest in the model set ( $\Delta_{AICc}$ ) and Akaike weights ( $\omega_i$ ).

| <b>Dependent</b> | <b>Formula</b>                                                                | <b>AICc</b> | <b>df</b> | <b>k</b> | <b><math>\Delta_{AICc}</math></b> | <b><math>\omega_i</math></b> |
|------------------|-------------------------------------------------------------------------------|-------------|-----------|----------|-----------------------------------|------------------------------|
| Fuel factor      | Migration distance + Wing aspect ratio + Flight type                          | -283.08     | 207       | 6        | 0.00                              | 0.98                         |
| Fuel factor      | Migration distance + Flight type+ Body mass                                   | -275.62     | 207       | 6        | 7.46                              | 0.02                         |
| Fuel factor      | Migration distance + Flight type                                              | -269.48     | 208       | 5        | 13.60                             | 0.00                         |
| Fuel factor      | Migration distance + Wing loading+ Flight type                                | -262.14     | 207       | 6        | 20.94                             | 0.00                         |
| Fuel factor      | Migration distance + Wing aspect ratio                                        | -260.70     | 210       | 3        | 22.38                             | 0.00                         |
| Fuel factor      | Migration distance + Wing aspect ratio + Wing loading                         | -259.01     | 209       | 4        | 24.07                             | 0.00                         |
| Fuel factor      | Migration distance + Wing aspect ratio + Body mass                            | -258.84     | 209       | 4        | 24.24                             | 0.00                         |
| Fuel factor      | Flight type+ Body mass                                                        | -258.46     | 208       | 5        | 24.62                             | 0.00                         |
| Fuel factor      | Migration distance + Wing loading                                             | -256.99     | 210       | 3        | 26.09                             | 0.00                         |
| Fuel factor      | Migration distance + Wing aspect ratio + Wing loading+ Body mass              | -256.92     | 208       | 5        | 26.15                             | 0.00                         |
| Fuel factor      | Migration distance + Body mass                                                | -256.66     | 210       | 3        | 26.42                             | 0.00                         |
| Fuel factor      | Migration distance                                                            | -256.41     | 211       | 2        | 26.67                             | 0.00                         |
| Fuel factor      | Migration distance + Wing loading+ Body mass                                  | -255.24     | 209       | 4        | 27.84                             | 0.00                         |
| Fuel factor      | Migration distance + Wing aspect ratio + Wing loading+ Flight type            | -255.07     | 206       | 7        | 28.00                             | 0.00                         |
| Fuel factor      | Migration distance + Wing aspect ratio + Flight type+ Body mass               | -254.85     | 206       | 7        | 28.22                             | 0.00                         |
| Fuel factor      | Migration distance + Wing aspect ratio + Wing loading+ Flight type+ Body mass | -252.99     | 205       | 8        | 30.08                             | 0.00                         |
| Fuel factor      | Wing aspect ratio + Flight type+ Body mass                                    | -252.82     | 207       | 6        | 30.26                             | 0.00                         |
| Fuel factor      | Wing aspect ratio + Wing loading+ Flight type+ Body mass                      | -251.31     | 206       | 7        | 31.76                             | 0.00                         |
| Fuel factor      | Migration distance + Wing loading+ Flight type+ Body mass                     | -251.19     | 206       | 7        | 31.88                             | 0.00                         |
| Fuel factor      | Wing loading                                                                  | -248.87     | 211       | 2        | 34.21                             | 0.00                         |
| Fuel factor      | Body mass                                                                     | -248.42     | 211       | 2        | 34.66                             | 0.00                         |
| Fuel factor      | Wing loading+ Body mass                                                       | -247.55     | 210       | 3        | 35.53                             | 0.00                         |
| Fuel factor      | Wing aspect ratio + Wing loading                                              | -246.87     | 210       | 3        | 36.21                             | 0.00                         |
| Fuel factor      | Wing aspect ratio + Body mass                                                 | -246.41     | 210       | 3        | 36.67                             | 0.00                         |
| Fuel factor      | Wing loading+ Flight type                                                     | -245.93     | 208       | 5        | 37.14                             | 0.00                         |
| Fuel factor      | <i>Intercept</i>                                                              | -245.55     | 212       | 1        | 37.53                             | 0.00                         |
| Fuel factor      | Wing aspect ratio + Wing loading+ Body mass                                   | -245.48     | 209       | 4        | 37.59                             | 0.00                         |
| Fuel factor      | Wing loading+ Flight type+ Body mass                                          | -244.29     | 207       | 6        | 38.79                             | 0.00                         |
| Fuel factor      | Wing aspect ratio                                                             | -244.24     | 211       | 2        | 38.84                             | 0.00                         |
| Fuel factor      | Wing aspect ratio + Wing loading+ Flight type                                 | -243.86     | 207       | 6        | 39.21                             | 0.00                         |
| Fuel factor      | Flight type                                                                   | -240.87     | 209       | 4        | 42.20                             | 0.00                         |
| Fuel factor      | Wing aspect ratio + Flight type                                               | -239.43     | 208       | 5        | 43.64                             | 0.00                         |

Figure S1. – Correlation between fat score and individual body condition in 26 bird species captured at the bird ringing station in the Danube–Delta Biosphere Reserve. Slopes and p values (shown in the upper left corner of each graph) were extracted from a linear regression between the two plotted variables.

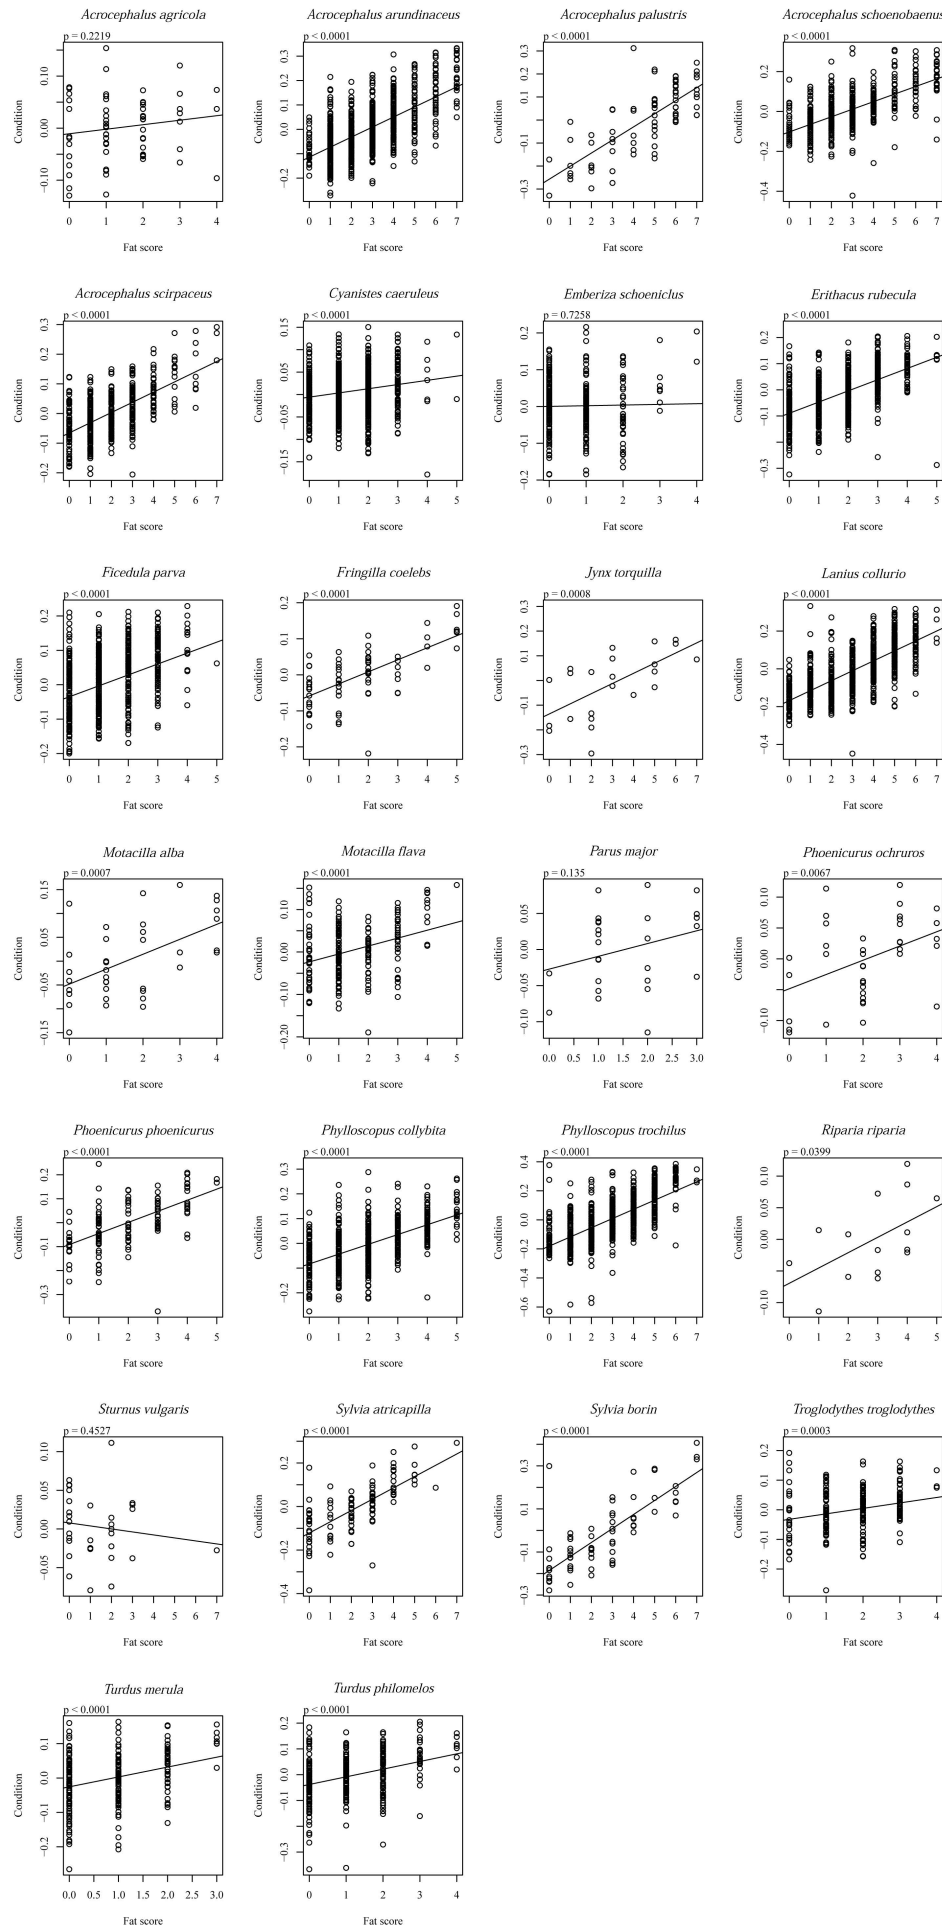

Supplement: jeb183517supp.pdf [file jeb183517supp.pdf]
